# Supplementary material for: Predictability of Cardiovascular Risk Scores for Carotid Atherosclerosis in Community-Dwelling Middle-Aged and Elderly Adults
Source: MDPI journal article supplement (doi:10.3390/jcm13092563), 2024-04-26
Supplement: s1 [file s1]

Supplementary Table S2. ROC analyses for having advanced CA.

| Model                     | AUROC  | (95% CI)          | $\Delta$ AUROC | (95% CI)           | p-value |
|---------------------------|--------|-------------------|----------------|--------------------|---------|
| FRS+Age                   | 0.8034 | (0.7835 ~ 0.8232) | Ref            |                    |         |
| FRS+Age+Sex               | 0.8040 | (0.7843 ~ 0.8236) | 0.0006         | (-0.012 ~ -0.0024) | 0.52    |
| FRS+Age+Cigarette smoking | 0.8037 | (0.7838 ~ 0.8235) | 0.0003         | (-0.0021 ~ 0.0026) | 0.81    |
| FRS+Age+DM                | 0.8043 | (0.7845 ~ 0.8240) | 0.0009         | (-0.0009 ~ 0.0027) | 0.33    |
| FRS+Age+Hypertension      | 0.8049 | (0.7852 ~ 0.8245) | 0.0015         | (-0.0011 ~ 0.0040) | 0.25    |
| FRS+Age+SBP               | 0.8035 | (0.7837 ~ 0.8234) | 0.0002         | (-0.0009 ~ 0.0012) | 0.73    |
| FRS+Age+DBP               | 0.8035 | (0.7836 ~ 0.8234) | 0.0001         | (-0.0009 ~ 0.0012) | 0.80    |
| FRS+Age+Total cholesterol | 0.8039 | (0.7842 ~ 0.8236) | 0.0005         | (-0.0006 ~ 0.0016) | 0.36    |
| FRS+Age+LDL-C             | 0.8051 | (0.7856 ~ 0.8247) | 0.0017         | (-0.0007 ~ 0.0041) | 0.15    |
| FRS+Age+HDL-C             | 0.8034 | (0.7837 ~ 0.8232) | 0.0001         | (-0.0010 ~ 0.0011) | 0.90    |
| FRS+Age+BMI               | 0.8033 | (0.7834 ~ 0.8231) | -0.0001        | (-0.0004 ~ 0.0002) | 0.51    |
| FRS+Age+WHR               | 0.8049 | (0.7853 ~ 0.8245) | 0.0015         | (-0.0010 ~ 0.0041) | 0.24    |
