# Supplementary material for: Predictability of Cardiovascular Risk Scores for Carotid Atherosclerosis in Community-Dwelling Middle-Aged and Elderly Adults
Source: MDPI journal article supplement (doi:10.3390/jcm13092563), 2024-04-26
Supplement: s1 [file s1]

Supplementary Table S1. ROC analyses for having CP.

| Model                     | AUROC  | (95% CI)          | $\Delta$ AUROC | (95% CI)            | p-value |
|---------------------------|--------|-------------------|----------------|---------------------|---------|
| FRS+Age                   | 0.7533 | (0.7375 ~ 0.7691) | Ref            |                     |         |
| FRS+Age+Sex               | 0.7540 | (0.7282 ~ 0.7697) | 0.0007         | (-0.0006 ~ -0.0019) | 0.32    |
| FRS+Age+Cigarette smoking | 0.7532 | (0.7375 ~ 0.7690) | -0.0001        | (-0.0013 ~ 0.0011)  | 0.89    |
| FRS+Age+DM                | 0.7533 | (0.7375 ~ 0.7691) | <0.0001        | (-0.0004 ~ 0.0005)  | 0.95    |
| FRS+Age+Hypertension      | 0.7552 | (0.7395 ~ 0.7709) | 0.0019         | (-0.0005 ~ 0.0044)  | 0.12    |
| FRS+Age+SBP               | 0.7533 | (0.7375 ~ 0.7691) | <0.0001        | (-0.0006 ~ 0.0005)  | 1.00    |
| FRS+Age+DBP               | 0.7535 | (0.7377 ~ 0.7786) | 0.0001         | (-0.0004 ~ 0.0007)  | 0.60    |
| FRS+Age+Total cholesterol | 0.7534 | (0.7376 ~ 0.7691) | 0.0001         | (-0.0005 ~ 0.0006)  | 0.87    |
| FRS+Age+LDL-C             | 0.7541 | (0.7383 ~ 0.7698) | 0.0008         | (-0.0011 ~ 0.0026)  | 0.41    |
| FRS+Age+HDL-C             | 0.7533 | (0.7376 ~ 0.7691) | <0.0001        | (-0.0001 ~ 0.0001)  | 0.62    |
| FRS+Age+BMI               | 0.7533 | (0.7376 ~ 0.7691) | <0.0001        | (-0.0002 ~ 0.0003)  | 0.79    |
| FRS+Age+WHR               | 0.7539 | (0.7382 ~ 0.7697) | 0.0006         | (-0.0009 ~ 0.0022)  | 0.42    |
